# Supplementary material for: Single-droplet surface-enhanced Raman scattering decodes the molecular determinants of liquid-liquid phase separation
Source: PubMed Central journal article supplement (PMC9334365; doi:10.1038/s41467-022-32143-0), 2022-07-28
Supplement: 41467_2022_32143_MOESM3_ESM.pdf [file 41467_2022_32143_MOESM3_ESM.pdf]

## **Description of Additional Supplementary Files**

Supplementary Movie 1 : Multiple Z stack images taken at different focal distances showing iodide-modified silver nanoparticles encapsulated within the fluorescently labeled FUS droplets.
